# Supplementary material for: High-Expansion Open-Cell Polylactide Foams Prepared by Microcellular Foaming Based on Stereocomplexation Mechanism with Outstanding Oil–Water Separation
Source: MDPI journal article supplement (doi:10.3390/polym15091984), 2023-04-22
Supplement: s1 [file s1]

## Supplementary information for

# High-expansion open-cell polylactide foams prepared by microcellular foaming based on stereocomplexation mechanism with outstanding oil-water separation

Dongsheng Li, Shuang Zhang, Zezhong Zhao, ZhenYun Miao, Guangcheng Zhang\*, and Xuetao Shi\*

School of Chemistry and Chemical Engineering, Key Laboratory of Macromolecular Science & Technology of Shaanxi Province, Northwestern Polytechnical University, Xi'an 710072, China

## S1. Characterization of synthesized 8-s-PDLA

The synthesized 8-s-PDLA by different feeding ratio were characterized by NMR, DSC and GPC. Table S1 listed the average number molecular weight and the average weight molecular weight, by both the calculation based on  $^1\text{H}$  NMR spectrum and GPC measurements. This indicated the successfully synthesis of 8-s-PDLA with high productivity.

**Table S1.** Molecular weight of star-shaped PDLA with different feeding ratios

| Feeding ratio | Theoretical molecular weight | $M_n$ (NMR) | $M_n$ (GPC) | $M_w$ (GPC) | PDI  | Productivity/% | $T_m/^\circ\text{C}$ |
|---------------|------------------------------|-------------|-------------|-------------|------|----------------|----------------------|
| 25:1          | 9500                         | 9000        | 8000        | 10700       | 1.33 | 74             | 103.5                |
| 40:1          | 15000                        | 13000       | 13200       | 15900       | 1.21 | 87             | 125.3                |
| 50:1          | 19000                        | 15000       | 21600       | 23200       | 1.08 | 92             | 143.4                |
| 100:1         | 38000                        | 39000       | 39200       | 43900       | 1.12 | 95             | 157.5                |

## S2. POM photographs of the isothermal crystallization of PLLA/8-s-PDLA blends

The influence of 8-s-PDLA on the crystallization behavior of PLLA is strongly related the molecular weight of 8-s-PDLA and its added contents. Figure S2 shows the POM photographs of PLLA/8-s-PDLA blends isothermal crystallized at 130 °C. The formation of SC-PLA between 8-s-PDLA and PLLA could greatly enhance the homo-crystallization. But higher molecular weight of 8-s-PDLA-39K in Figure s1(d) would lead to high stereocomplexation density, which further confine the chain mobility. This is the explanation that addition of 8-s-PDL with higher molecular weight results in less spherulites density but bigger spherulites size.

The comparison of thermal parameters in DSC curves of pure PLLA and PLLA/8-s-PDLA is shown in Table S2.

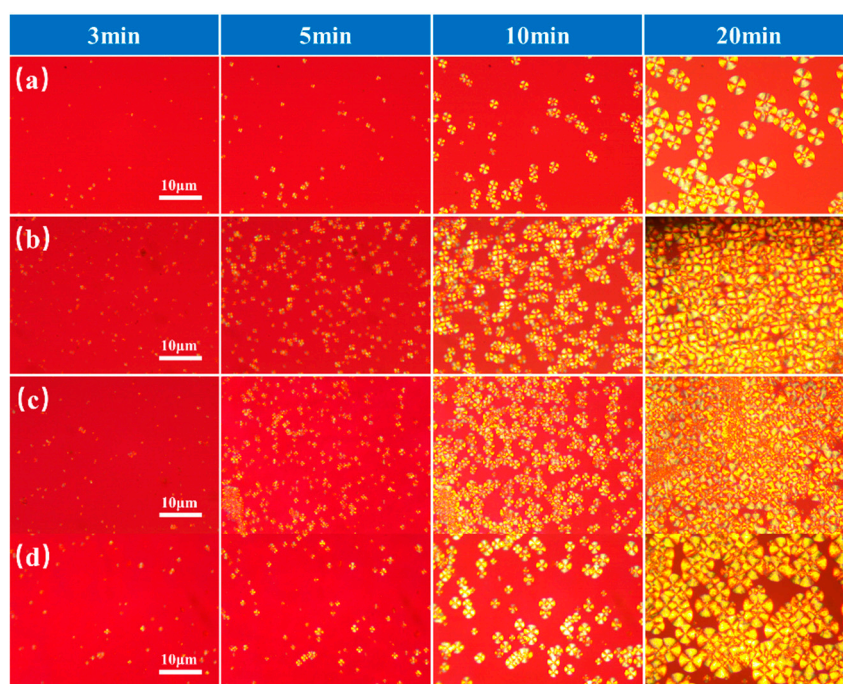

**Figure S1** POM photographs of PLLA and PLLA-based blends isothermal crystallized at 130 °C: (a) pure PLLA, (b) PLLA/8-s-PDLA-13K-5%, (c) PLLA/8-s-PDLA-15K-5%, (d) PLLA/8-s-PDLA-39K-5%

**Table S2.** Comparison of thermal paraments of PLLA and PLLA/8-s-PDLA

| Samples               | $T_g$ (°C) | $T_c$ (°C) | $T_{m, PLA}$ (°C) | $T_{m, SC-PLA/}$ (°C) |
|-----------------------|------------|------------|-------------------|-----------------------|
| PLLA                  | 64.8       | 115.3      | 166.5             | -                     |
| PLLA/8-s-PDLA-13K-3%  | 64.3       | 114.5      | 163.0             | 190.7                 |
| PLLA/8-s-PDLA-13K-5%  | 64.2       | 106.2      | 167.5             | 190.8                 |
| PLLA/8-s-PDLA-13K-10% | 64.2       | 115.2      | 164.2             | 191.2                 |
| PLLA/8-s-PDLA-15K-5%  | 64.5       | 120.5      | 165.2             | 193.2                 |
| PLLA/8-s-PDLA-39K-5%  | 64.8       | 114.8      | 164.2             | 208.2                 |

**S3. Foaming behavior of PLLA/8-s- PDLA blends by microcellular foaming**

The foaming behavior of PLLA/8-s- PDLA blends is strongly related with the foaming conditions, including the foaming temperature and foaming pressure. As shown in Figures 9 and 10 in the main text, the related characteristic parameters of PLLA/8-s-PDLA-13K foams are listed in Table S3.

**Table S3.** Characteristic parameters of PLLA/8-s-PDLA-13K foams prepared by different processing conditions

| Foaming conditions | Cell size/( $\mu\text{m}$ ) | Density/ ( $\text{g}/\text{cm}^3$ ) | Expansion ratio | cell density       |
|--------------------|-----------------------------|-------------------------------------|-----------------|--------------------|
| 115°C &20MPa       | 17.97                       | 0.21                                | 6.12            | $1.51 \times 10^9$ |
| 120°C &20MPa       | 22.90                       | 0.14                                | 8.98            | $1.07 \times 10^9$ |
| 125°C &20MPa       | 27.17                       | 0.15                                | 8.63            | $6.18 \times 10^8$ |
| 130°C &20MPa       | 27.95                       | 0.15                                | 8.61            | $5.67 \times 10^8$ |
| 135°C &20MPa       | 26.50                       | 0.15                                | 8.95            | $6.91 \times 10^8$ |
| 120°C &16MPa       | 25.57                       | 0.15                                | 8.54            | $7.34 \times 10^8$ |
| 120°C &22MPa       | 20.37                       | 0.15                                | 8.71            | $1.48 \times 10^9$ |
